# 1 **Range reduction of the Oblong Rocksnail, *Leptoxis*** 2 ***compacta*, shapes riverscape genetic patterns**

3  
4 Aaliyah D. Wright<sup>1</sup>, Nicole L. Garrison<sup>2</sup>, Ashantye' S. Williams<sup>3</sup>, Paul D. Johnson<sup>4</sup>, Nathan V.  
5 Whelan<sup>2,3</sup>

6  
7 <sup>1</sup>Tuskegee University, Tuskegee, Alabama, USA

8  
9 <sup>2</sup>School of Fisheries, Aquaculture, and Aquatic Sciences, College of Agriculture, Auburn  
10 University, Auburn, Alabama USA

11  
12 <sup>3</sup>Southeast Conservation Genetics Lab, Warm Springs Fish Technology Center, United States  
13 Fish and Wildlife Service, Auburn, Alabama, USA

14  
15 <sup>4</sup>Alabama Aquatic Biodiversity Center, Alabama Department of Conservation and Natural  
16 Resources, Marion, Alabama, USA.

17  
18  
19 Corresponding Authors:

20 Aaliyah D. Wright<sup>1</sup>

21 Tuskegee University, Tuskegee, Alabama, USA

22 Email address: [awright1863@tuskegee.edu](mailto:awright1863@tuskegee.edu)

23  
24 Nathan V. Whelan<sup>2,3</sup>

25 203 Swingle Hall, Auburn, AL 36849, USA

26 Email address: [nathan\\_whelan@fws.gov](mailto:nathan_whelan@fws.gov)

27  
28  
29  
30  
31  
32  
33  
34  
35  
36  
37  
38  
39  
40  
41  
42  
43  
44  
45

## 46 **Abstract**

47 Many freshwater gastropod species face extinction, including 79% of species in the  
48 family Pleuroceridae. The Oblong Rocksnail, *Leptoxis compacta*, is a narrow range endemic  
49 pleurocerid from the Cahaba River basin in central Alabama that has seen rapid range  
50 contraction in the last 100 years. Such a decline is expected to negatively affect genetic diversity  
51 in the species. However, precise patterns of genetic variation and gene flow across the restricted  
52 range of *L. compacta* are unknown. This lack of information limits our understanding of human  
53 impacts on the Cahaba River system and Pleuroceridae. Here, we show that *L. compacta* has  
54 likely seen a species-wide decline in genetic diversity, but remaining populations have relatively  
55 high genetic diversity. We also report a contemporary range extension compared to the last  
56 published survey. *Leptoxis compacta* does not display an isolation by distance pattern,  
57 contrasting patterns seen in many riverine taxa. Our findings also indicate that historical range  
58 contraction has resulted in the absence of common genetic patterns seen in many riverine taxa  
59 like isolation by distance as the small distribution of *L. compacta* allows for relatively  
60 unrestricted gene flow across its remaining range despite limited dispersal abilities. Two  
61 collection sites had higher genetic diversity than others, and broodstock sites for future captive  
62 propagation and reintroduction efforts should utilize sites identified here as having the highest  
63 genetic diversity. Broadly, our results support the hypothesis that range contraction will result in  
64 the reduction of species-wide genetic diversity, and common riverscape genetic patterns cannot  
65 be assumed to be present in species facing extinction risk.

66  
67  
68  
69  
70  
71  
72  
73  
74  
75  
76  
77  
78  
79  
80  
81  
82  
83  
84  
85  
86  
87  
88  
89  
90  
91

## 92 Introduction

93 Freshwater gastropods of the United States suffer one of the highest imperilment rates of  
94 any taxonomic group in North America (Johnson et al., 2013). Despite being critical components  
95 of many freshwater ecosystems, freshwater gastropods are grossly understudied compared to  
96 freshwater fish, mussels, and crayfish (Covich, Palmer & Crowl, 1999; Huryn, Benke & Ward,  
97 1995; Strong et al., 2008). This creates a situation where desperately needed conservation efforts  
98 are hindered by a lack of information (Johnson et al., 2013). For example, data on the current  
99 range of many freshwater gastropods is lacking (Lydeard et al., 2004), but conservation  
100 assessments and effective management plans require detailed historical and contemporary range  
101 data (Potter & Thomas, 1983; USFWS, 2018). Population genetics data on freshwater gastropods  
102 are also needed to inform management efforts and provide basic understanding of freshwater  
103 ecosystems (Lysne et al., 2008).

104 The freshwater gastropod family Pleuroceridae is one group that suffers from a high  
105 imperilment rate (79%) and little research attention (Brown, Lang & Perez, 2008; Johnson et al.,  
106 2013; Perez & Minton, 2008). Pleurocerids are found east of the Rocky Mountains in North  
107 America, with most of their diversity concentrated in the southeastern United States (Lydeard &  
108 Mayden, 1995; Strong & Köhler, 2009). Pleurocerids lack a highly vagile veliger larval stage  
109 seen in many aquatic gastropod groups, and they are thought to move large distances only when  
110 washed downstream (Whelan et al., 2019; Whelan, Johnson & Harris, 2015). Only one study has  
111 been published on landscape and conservation genetics of pleurocerids, and that study focused  
112 exclusively on a single species, *Leptoxis ampla* (Whelan et al., 2019). Many freshwater species,  
113 including *L. ampla*, display common riverscape genetic patterns such as increased genetic  
114 diversity in downstream populations and isolation by distance (Hughes, Schmidt & Finn, 2009;  
115 Paz-Vinas et al., 2015). However, few studies have tested for such patterns in riverine species  
116 that have undergone drastic range reduction, and no such study has been done for a range  
117 restricted pleurocerid.

118 One pleurocerid in need of more research is the Oblong Rocksnail, *Leptoxis compacta*  
119 (Figs. 1,2). This species is a narrow range endemic known historically from the middle Cahaba  
120 River and a single tributary in central Alabama, USA (Fig. 2; Goodrich, 1922). Until recently,  
121 *Leptoxis compacta* was considered extinct as it had not been collected, or at least identified  
122 correctly, from 1935 to 2011 (Goodrich, 1941; Johnson et al., 2006; Whelan, Johnson & Harris,  
123 2012). As early as 1941, the decline of *L. compacta* was documented (Goodrich, 1941), and the  
124 species now occupies less than 5% of its historical range (Fig. 2; Whelan, Johnson & Harris,  
125 2012). As a narrow range endemic with few historical collections, little is known about the  
126 species aside from recent survey efforts and limited life history data (Whelan, Johnson & Harris,  
127 2012). Yet, the rediscovery of *L. compacta* in 2011 resulted in an emergency petition to list the  
128 species under the US Endangered Species Act (Kurth, 2017). For management agencies to assess  
129 the status of *L. compacta* and design effective conservation plans, detailed survey work and  
130 population genetics research are required. Modern population genomic tools such as restriction  
131 site associated DNA sequencing (RAD-seq) can provide data that will enhance *L. compacta*  
132 management options (Andrews et al., 2016). As a result of having a narrow range along a single  
133 river path, an effective recovery strategy for *L. compacta* will likely require reintroduction  
134 efforts to previously occupied habitat(s). Maintaining genetic diversity of imperiled species is  
135 important for mitigating extinction risk (Frankham, 2005; Frankham, 2010), and reintroduction  
136 efforts will require detailed population genetics data to inform broodstock selection for  
137 maximizing genetic diversity of captively reared offspring.

138 In this study, we generated a dataset of thousands of single nucleotide polymorphisms  
139 (SNPs) to answer questions about conservation and riverscape genetics of *L. compacta*. Given  
140 the drastic range decline suffered by *L. compacta*, we set out to test the following hypotheses: 1)  
141 *Leptoxis compacta* has undergone a severe genetic bottleneck and 2) genetic diversity of *L.*  
142 *compacta* is considerably lower than *L. ampla*, a sympatric and wider ranging species. We also  
143 examined how genetic diversity of *L. compacta* varies across its current range, specifically  
144 assessing whether broad patterns seen in many other riverine taxa like isolation by distance and  
145 strong genetic structure are seen in *L. compacta*.

146

## 147 **Materials & Methods**

### 148 *Sample Collection*

149 *Leptoxis compacta* was collected during two trips to the Cahaba River in June 2018 and  
150 June 2019. We performed survey work at four sites, and all sites except Cahaba River above  
151 Shades Creek were outside the previously documented contemporary range of *L. compacta* (Fig.  
152 3; Whelan et al. 2012). At each location, individuals were collected by hand and identified in the  
153 field. Despite being a narrow range endemic that has undergone distributional decline, *L.*  
154 *compacta* was locally abundant where found. Based on qualitative observations, we sampled less  
155 than 1% of the population, making our sampling negligible to species survival. Twenty  
156 specimens from each site were transported live to the lab, sacrificed following Fukuda et al.,  
157 (2008), and placed in 96-100% ethanol until tissue clips could be taken. Specimens were  
158 collected under an Alabama Department of Conservation and Natural Resources Educational  
159 Scientific Collections Permit (License #2019100990068680) or as an agent of the state (P.D.  
160 Johnson). All shells have been cataloged separately to correspond to associated molecular data  
161 and deposited at the Auburn University Museum of Natural History (AUMNH 45652-45690;  
162 Table 1, Supplementary Table 1).

163

### 164 *Molecular data generation*

165 Tissue clips from the foot of 20 individuals per collection site were taken and subjected  
166 to a standard proteinase K digestion. DNA was extracted with the Qiagen DNeasy Plant Mini Kit  
167 with a minor modification to allow for tissue digested with proteinase K. We used a plant kit  
168 because it works well on freshwater gastropods that produce large amounts of mucus  
169 polysaccharides (Whelan et al., 2019). The integrity of whole genomic DNA was checked on a  
170 1% agarose gel and quantified with a Qubit DNA assay. Extracted DNA was standardized to 120  
171 ng/ $\mu$ L for 2bRAD library prep.

172 A reduced representation genomic library was generated for genotyping using the Alfi  
173 enzyme and the 2bRAD library prep protocol of Wang et al. (2012). This RAD-seq approach  
174 uses a type IIB restriction enzyme that has two recognition sites. Alfi recognizes two sites  
175 separated by six base pairs and makes two cuts that each have a one base pair overhang 12 base  
176 pairs from the 5' and 3' ends of the restriction sites. Following Whelan et al. (2019), we did a  
177 1/16<sup>th</sup> genomic reduction by using adaptors in the ligation step that had an "NC" overhang, thus  
178 only binding to Alfi RAD-loci that had a G base pair at the first base pair of each restriction cut  
179 overhang. For more details, see Wang et al. (2012) and the lab protocol on the FigShare  
180 repository for this study (DOI: 10.6084/m9.figshare.12014619).

181 All samples were dual-indexed for pooling. Sequencing occurred in multiple batches. The  
182 first batch had 48 *L. compacta* samples pooled in equimolar concentrations and sequenced on a  
183 single lane. The other individuals were pooled in equimolar concentrations with samples from

184 projects on conservation genomics of other pleurocerid species, and 87 individuals were  
185 sequenced per HiSeq 4000 lane. Although batch effects in RADseq data have been recently  
186 noted in studies that used different read lengths among sequencing runs (Leigh, Lischer &  
187 Keller, 2018) and in species introgression studies (Lambert et al., 2019), such issues were not  
188 relevant to our sequencing design or study objectives. Nevertheless, we took steps to limit  
189 potential batch effects by implementing strict filtering parameters during dataset assembly (see  
190 below). Pooled libraries were sequenced on an Illumina HiSeq 4000 with 1 X 75bp chemistry at  
191 University of Oregon Genomics and Cell Characterization Core Facility.

192 Raw Illumina reads were demultiplexed with the STACKS 1.48 (Catchen et al., 2013)  
193 module *process\_radtags*, allowing for one mismatch per barcode. Demultiplexed reads were  
194 quality filtered with the script *QualFilterFastq.pl* ([http://github.com/Eli-](http://github.com/Eli-Meyer/sequence_processing)  
195 [Meyer/sequence\\_processing](http://github.com/Eli-Meyer/sequence_processing)) for any read that had five or more base pairs with Phred quality  
196 scores less than 20. Reads were processed with scripts from SHRiMP 2.23 (Rumble et al., 2009)  
197 and subsequently trimmed to Alfl RAD-loci with the script *AlflExtract.pl* ([http://github.com/Eli-](http://github.com/Eli-Meyer/2bRAD_utilities)  
198 [Meyer/2bRAD\\_utilities](http://github.com/Eli-Meyer/2bRAD_utilities)). As this step removes any sequence that is not part of the RAD-locus,  
199 adaptor sequences and non-target sequences are removed from the sequencing reads. RAD-loci,  
200 defined as the stretch of DNA cut by the Alfl enzyme, were assembled with the STACKS 1.48  
201 pipeline *denovo\_map.pl* as no reference genome is available for *L. compacta*. For *denovo\_map.pl*  
202 parameters, we set minimum stack depth to five (-m 5), distance allowed between stacks to three  
203 (-M 3), and distance between catalog RAD-loci to two (-n 2). These parameters were determined  
204 to be most appropriate for our data following Paris et al. (2017). All other *denovo\_map.pl*  
205 parameters were set to defaults.

206 After assembly, RAD-loci were filtered for missing data using the STACKS program  
207 *populations*. In order to pass filtering steps, a RAD-locus had to be present in 75% of individuals  
208 from any given collection site and also present at three collection sites. RAD-loci that had a  
209 minimum minor allele frequency of less than 2.5% or heterozygosity higher than 50% were  
210 removed to limit the influence of paralogy and misassembly on final datasets. Sequencing  
211 coverage of RAD-loci with SNPs was measured with *vcftools* (Jombart & Ahmed, 2011).  
212 Kinship coefficients among individuals were inferred with KING (Manichaikul et al., 2010).  
213 Files output by STACKS were formatted for KING with PLINK 1.9 (Chang et al., 2015), and  
214 pairwise kinship coefficients were calculated with the KING flag "--kinship". No individuals  
215 were determined to be closely related by KING so no further dataset filtering was done.

216 After filtering, a dataset that included all SNPs per RAD-locus and a dataset with only  
217 one random SNP per RAD-locus were generated. We assume that RAD-loci are unlinked and  
218 that the one SNP per RAD-locus dataset had zero linkage disequilibrium. Analyses employed the  
219 one SNP per RAD-locus dataset, unless otherwise noted.

220

### 221 *Population genetics analyses*

222 Average observed heterozygosity ( $H_o$ ), expected heterozygosity ( $H_e$ ), nucleotide diversity  
223 ( $\Pi$ ), and  $F_{IS}$  at each collection site were calculated by *populations*. The number of private alleles  
224 at each site was also reported by *populations*. Average allelic richness ( $A_r$ ) was calculated with  
225 the R (R Core Team, 2020) package *diveRsity* (Keenan et al., 2013). An analysis of molecular  
226 variance (AMOVA; Excoffier, Smouse & Quattro, 1992) was done with the R packages *poppr*  
227 (Kamvar, Tabima & Grünwald, 2014) to test genetic structure among collection sites. AMOVA  
228 was implemented with the function "poppr.amova" using the *ade4* method (Dray & Dufour,  
229 2007) and 10,000 permutations.

230 We also tested for a pattern of isolation by distance by measuring the correlation between  
231 pairwise  $F_{ST}$  values and geographical distance between collection sites. Pairwise  $F_{ST}$  values were  
232 calculated using the Weir and Cockerham (1984) method with the R package hierfstat (Goudet,  
233 2005). Stream distance was measured in Google Earth by tracing paths between collection sites  
234 along the Cahaba River (see Table 2). River distance was used, rather than straight line distances,  
235 because migration over land is impossible for gill breathing pleurocerids. A Mantel test was  
236 performed with the R package ade4 (Dray & Dufour, 2007), and significance was tested with  
237 1,000 permutations. However, Mantel tests have been criticized as a method for testing isolation  
238 by distance (Legendre, Fortin & Borcard, 2015; Meirmans, 2015), so we also performed a  
239 multiple regression on distance matrices with 1,000 permutations using the R package ecodist  
240 and its MRM function (Goslee & Urban, 2007). In addition to a pattern of isolation by distance,  
241 past studies have shown that many freshwater organisms, including pleurocerids, display a  
242 pattern of increased genetic diversity in more downstream populations (Paz-Vinas et al., 2015;  
243 Whelan et al., 2019). Therefore, to better assess riverscape genetic patterns of *L. compacta*, we  
244 performed linear regression of distance from the most downstream site against  $H_o$ ,  $H_e$ ,  $A_r$ , and  $\Pi$ .  
245 Linear regressions were done in R.

246 We examined clustering of *L. compacta* genetic data with discriminant analysis of  
247 principal components (DAPC). We used the multiple SNPs per RAD-locus dataset and the R  
248 package adegenet (Jombart & Ahmed, 2011) to perform DAPC. We first used the adegenet  
249 function “find.clusters” testing up to 25 clusters and using Bayesian information criteria (BIC) to  
250 identify the best-fit number of clusters for our data. Using the number of clusters with the lowest  
251 BIC value, we performed a DAPC with the adegenet function “dapc” and plotted the results in R.

252 We inferred genomic admixture of *L. compacta* individuals with ADMIXTURE 1.3  
253 (Shringarpure et al., 2016). ADMIXTURE assumes zero linkage disequilibrium, so we used the  
254 one SNP per RAD-locus dataset. ADMIXTURE analyses were run with the AdmixPipe pipeline  
255 (Mussmann et al., 2020). To determine the best-fit number of clusters (K) for our data, K values  
256 from 1 to 5 were assessed with 20% cross-validation. Twenty replicates of ADMIXTURE were  
257 run at each K, and the best-fit K was determined as the value that had the lowest average CV  
258 score across replicates. ADMIXTURE results were visualized with Clumpak (Kopelman et al.,  
259 2015).

260 Genomic co-ancestry among individuals was also assessed with fineRADstructure  
261 (Malinsky et al., 2018). Unlike ADMIXTURE, fineRADstructure can use linked SNPs and  
262 provides additional information on individual genomic background. Thus, the multiple SNPs per  
263 RAD-locus dataset was used for fineRADstructure analyses. First, a co-ancestry matrix was  
264 inferred with the script RADpainter. Subsequently, clustering was done with the Markov chain  
265 Monte Carlo method of fineRADstructure, running for 500,000 generations and sampling every  
266 1,000 generations; the first 200,000 generations were discarded as burn-in (non-default  
267 parameters: -x 200000 -y 300000 -z 1000). We also inferred a tree for visualization with  
268 fineRADstructure using the tree-building algorithm of Lawson et al. (2012) with 10,000 attempts  
269 (non-default parameters: -m T -x 10000). fineRADstructure results were plotted with R scripts  
270 included in the fineRADstructure package.

271  
272 *Code and data availability*

273 All bash and R scripts used for processing and analyzing data are available at  
274 [github.com/nathanwhelan](https://github.com/nathanwhelan). Demultiplexed raw Illumina reads have been uploaded to NCBI under  
275 BioProject PRJNA631794. Assembled datasets in various file formats (e.g., vcf, genepop) and

276 the 2bRAD library prep protocol are available on FigShare (DOI:  
277 10.6084/m9.figshare.12014619).

278

## 279 **Results**

### 280 *Sample Collection*

281 During survey work, we collected *L. compacta* from Cahaba River at old Marvel slab  
282 upstream to Cahaba River at Booth's Ford (Fig. 3). All sites except Cahaba River at Shades  
283 Creek are sites where *L. compacta* was not found during survey work over the least 30 years.  
284 Our collections represent a 1.83 km downstream range extension and a 4.76 km upstream  
285 extension compared to the previously documented contemporary range of *L. compacta* (Whelan,  
286 Johnson & Harris, 2012). While this study was ongoing, 3 putative *L. compacta* individuals were  
287 collected at Cahaba River at Belle Ellen Shoals (Fig. 3) during a general mollusk survey  
288 (Johnson, 2019). However, species identification was uncertain and *L. compacta* appeared  
289 exceedingly rare. Therefore, individuals from Cahaba River at Belle Ellen Shoals were not  
290 included in our analyses, and we consider this record unconfirmed without additional positive  
291 survey results.

292

### 293 *Molecular data and population genetics*

294 DNA yields for two individuals were too low for library preparation so only 19  
295 individuals were sequenced from Cahaba River at old Marvel Slab and Cahaba River at Booth's  
296 Ford. The number of demultiplexed raw reads per individuals varied from 930,062-10,146,649  
297 (mean = 4,836,812). Much of the variation in raw reads can be attributed to whether the  
298 individual was sequenced on a HiSeq 4000 lane with 48 or 87 samples. Aside from raw read  
299 number, we saw no evidence of batch affects like individuals from one sequencing run all  
300 clustering together in analyses (see below). After initial raw-read filtering, the number of reads  
301 that passed quality filtering steps ranged from 865,314-9,838,187 (mean = 4,632,510). Assembly  
302 with the STACKS *denovo\_map* pipeline resulted in 105,542 RAD-loci. Filtering with  
303 *populations*, including removal of 4,009 invariant RAD-loci that passed all filters, resulted in a  
304 dataset with 4,962 RAD-loci with at least one SNP. Per individual average sequencing coverage  
305 of filtered RAD-loci with at least one SNP, excluding missing genotypes, ranged from 31.7-  
306 343.2. Average sequencing coverage across variable RAD-loci, excluding missing genotypes,  
307 was 163.7. Kinship coefficients inferred with KING indicated that no individuals were closely  
308 related (i.e., half or full siblings).

309 The number of private alleles at each site ranged from 28-262 (Table 1).  $H_o$  at each  
310 collection site ranged from 0.0963-0.1568, and  $H_e$  ranged from 0.0980 to 0.1801 (Table 1). At  
311 each site,  $H_o$  was lower than  $H_e$ , except at Cahaba River at canoe launch where  $H_o$  was 0.001  
312 greater than  $H_e$  (Table 1). The difference between  $H_o$  and  $H_e$  was largest at Cahaba River above  
313 Shade Creek and Cahaba River at Booth's Ford.  $A_r$  and  $\Pi$  ranged from 1.4511-1.8241 and  
314 0.1010-0.1829, respectively (Table 1).  $F_{IS}$  values ranged from 0.0134-0.1934 (Table 1), with the  
315 highest values being at Cahaba River above Shades Creek and Cahaba River at Booth's Ford.  
316 Overall, genetic diversity was greatest at the most upstream site, Cahaba River at Booth's Ford,  
317 and lowest at the most downstream site, Cahaba River at old Marvel slab. All linear regressions  
318 of diversity statistics vs distance from the most downstream site were non-significant ( $p \geq$   
319 0.169).

320 Pairwise  $F_{ST}$  values among sites ranged from 0.0-0.055 (Table 2). We found no evidence  
321 of an isolation by distance pattern among sites (Mantel test,  $p = 0.843$ ; multiple regression,  $p =$

322 0.428). According to the AMOVA, significant genetic structure was present among collection  
323 sites ( $p = 0.004$ ), but only 4.16% of variation was explained by collection site. In contrast, 81.8%  
324 of genetic variation was explained by within individual variation, further indicating high  
325 amounts of gene flow among collection sites.

326 DAPC indicated two genetic clusters were present in our data. Data were explained by a  
327 single discriminate function, and results are therefore presented as a frequency histogram (Fig.  
328 4). ADMIXTURE analyses indicated that genetic diversity from two ancestral populations were  
329 present in our data ( $K = 2$ ). Most individuals from across the range of *L. compacta* had a  
330 genomic admixture profile that was dominated by a genomic background from a single ancestral  
331 population, likely indicating that overall genomic diversity has been lost across the range of *L.*  
332 *compacta*. Nevertheless, 14 individuals had varying levels of admixture with a second ancestral  
333 population (Fig. 3). fineRADstructure analyses corroborated ADMIXTURE analyses as two  
334 semi-distinct groupings were recovered by fineRADstructure (Fig. 5, Supplementary Fig. 1).  
335 fineRADstructure groupings did not correspond to collection site or any other obvious variable,  
336 indicating gene flow among collection sites. Notably, six individuals with comparably high co-  
337 ancestry proportions (upper right of co-ancestry matrix in Fig. 5) correspond to individuals in  
338 ADMIXTURE analyses with a large proportion of genetic background from the less common  
339 ancestral population (represented by orange in Fig. 3).

340

## 341 Discussion

342 Our findings provide reasons to be optimistic about the survival of *L. compacta*. Despite  
343 a drastic range reduction in the last 120 years, we found *L. compacta* more widespread than  
344 documented in other recent surveys. Furthermore, the remaining sites where *L. compacta* occurs  
345 retain a relatively high amount of genetic diversity. Across its range, *L. compacta* had similar  
346 levels of  $H_o$  and  $\Pi$  to *L. ampla*, a species that is currently found across the historical range of *L.*  
347 *compacta* and in some tributaries like Shades Creek and Little Cahaba River (Whelan et al.,  
348 2019). The lowest genetic diversity values observed for *L. compacta* were greater than the lowest  
349 values determined for *L. ampla*. This observation rejects one of our main hypotheses that *L.*  
350 *compacta* would have lower genetic diversity than the more widespread *L. ampla*. Nevertheless,  
351 *L. compacta* is restricted to a 9.2 km stretch of river, and *L. compacta* has likely lost range-wide  
352 genetic diversity. This probable loss of evolutionary potential could be detrimental to the long-  
353 term survival of the species.

354 Observed *L. compacta* genetic patterns often conflicted with predictions made by broad-  
355 scale hypotheses about riverscape genetics. For example, we did not see an isolation by distance  
356 pattern, which is common among freshwater taxa (Hughes, Schmidt & Finn, 2009) and was  
357 documented in *L. ampla* (Whelan et al., 2019). We also did not uncover a pattern of increased  
358 genetic diversity in downstream populations, despite such a pattern being present in numerous  
359 plants and animals (Paz-Vinas et al., 2015), including *L. ampla* (Whelan et al., 2019). Patterns  
360 determined for *L. compacta* are likely explained by a drastic range reduction and the limited  
361 scale at which we performed the current study. That is, gene flow across the 9.2 km  
362 contemporary range of *L. compacta* explains observed patterns of riverscape genetic diversity.

363

### 364 *Genetic diversity across a small landscape*

365 The two most distant collection sites in this study were separated by a smaller distance  
366 (9.2 km) than all but two sites sampled for *L. ampla* in a previous study (Whelan et al., 2019).  
367 Therefore, it is difficult to make direct comparisons between genetic patterns of *L. ampla* and *L.*



368 *compacta*. However, we can leverage differences in geographical scale between the two studies  
369 to make inferences about fine-scale versus long-distance genetic patterns in pleurocerids.  $F_{ST}$   
370 values among *L. compacta* collection sites (Table 2) were much lower than values determined  
371 for populations of *L. ampla* ( $F_{ST}$  0.377-0.773; Whelan et al. 2019). Furthermore, even though  
372 AMOVA indicated significant genetic structure among *L. compacta* collection sites, the small  
373 amount of genetic variation that is explained by collection site probably limits its biological  
374 relevance. Overall, these data indicate that pleurocerid riverscape genetic patterns across small  
375 distances will not always follow common patterns such as isolation by distance and increased  
376 genetic diversity at more downstream collection sites. This is likely attributable to gene flow and  
377 random drift that prevent the establishment of genetic patterns typically seen across more  
378 geographically separated collection sites. From a historical standpoint, we hypothesize that *L.*  
379 *compacta* previously displayed an isolation by distance pattern across its range, similar to the  
380 patterns determined for *L. ampla* (Whelan et al., 2019). We think this scenario is likely given  
381 limited dispersal abilities of pleurocerids and patterns established for *L. ampla*, a species that  
382 retains a much larger portion of its historic range in the Cahaba River drainage than *L. compacta*.  
383 Whether or not there was a similar historical pattern of increased genetic diversity in downstream  
384 populations of *L. compacta* is more difficult to infer, as such a pattern may not be influenced  
385 solely by dispersal ability.

386 Given the well-documented decline of *L. compacta*, a small number of individuals with a  
387 less common genomic background suggests that the species has lost genetic diversity through  
388 bottleneck and drift. Patterns seen in DAPC, ADMIXTURE, and fineRADstructure were not  
389 driven by geography as individuals with the less common genomic background were not found  
390 in adjacent sites (orange in DAPC and ADMIXTURE plots and upper right corner of  
391 fineRADstructure plot; Figs. 3-5, Supplementary Fig. 1). Although individuals with some  
392 admixture from the uncommon ancestral population may be present in unsampled individuals at  
393 Cahaba River at old Marvel slab and Cahaba River at canoe launch, they would be uncommon.  
394 Recent migration is an unlikely explanation of observed co-ancestry profiles as it would indicate  
395 that a sizeable population of *L. compacta* exists elsewhere in the Cahaba River. The most likely  
396 hypothesis for explaining observed clustering and co-ancestry profiles (Figs. 3-5) is a genetic  
397 bottleneck resulting from species decline in the 20<sup>th</sup> century. In this scenario, *L. compacta* was  
398 genetically diverse across its historical range prior to decline, but range contraction caused a  
399 considerable loss of genetic diversity. In turn, genetic drift resulted in the observed coancestry  
400 pattern of one ancestral population being more common in extant individuals (Figs. 3, 5).

401 Broadly, genetic structure across the current range of *L. compacta* can be characterized  
402 by a single population with some subpopulation structure at Cahaba River above Shades Creek  
403 and Cahaba River at Booth's Ford (Figs. 3-5; Supplementary Figure 1). The subpopulation  
404 structure appears to be causing a Wahlund effect (Wahlund, 1928). That is, the Wahlund effect  
405 predicts the lower  $H_o$  values compared to  $H_e$  values and the higher  $F_{IS}$  values seen in collection  
406 sites with inferred subpopulation structure (Fig. 3; Table 2). An alternative explanation for the  
407 observed pattern of  $F_{IS}$  and  $H_e$  is null alleles. However, null alleles are unlikely as they would  
408 increase pairwise  $F_{ST}$  values (De Meeûs, 2018) that are uniformly low across populations (Table  
409 2). Despite the putative presence of a Wahlund effect, Cahaba River above Shades Creek and  
410 Cahaba River at Booth's Ford have greater genomic diversity than the two other sites (Table 1;  
411 Figs. 3-5). These sites may have better habitat suitability than the other two, allowing for *L.*  
412 *compacta* to persist with greater genetic diversity as the species declined in the 20<sup>th</sup> century.

413

#### 414 Conservation of *Leptoxis compacta*

415 *Leptoxis compacta* suffered a massive decline during the 20<sup>th</sup> century, a period of intense  
416 mining, forestry, and urban development in the Cahaba River drainage (Onorato, Angus &  
417 Marion, 2000; Pitt, 2000; Shepard et al., 1994; Tolley-Jordan, Huryn & Bogan, 2015). The  
418 decline was so drastic that *L. compacta* was considered extinct less than a decade ago.  
419 Conservation efforts are needed to ensure the long-term survival of *L. compacta* as the species is  
420 at risk from both chronic habitat degradation and one-time catastrophic events. Two potential  
421 management strategies for *L. compacta* are habitat restoration and reintroduction with captively  
422 reared individuals.

423 In this study, we report an 8.26 km known range extension for *L. compacta*. One site,  
424 Cahaba River at old Marvel Slab, was previously the focus of intense habitat restoration through  
425 the removal of a low-level dam (Johnson et al. 2013). The site may have also benefited from  
426 improved water quality in Shades Creek (ADEM, 2007; ADEM, 2012) as the site is just below  
427 its confluence with the Cahaba River. Since removal of the low-level dam, increases in fish  
428 abundance and diversity have been reported (Bennett et al., 2015). Considering *L. compacta* was  
429 not found at this site by Whelan, Johnson & Harris (2012), we think habitat either improved from  
430 a point where *L. compacta* could not survive or from a point of considerably lower carrying  
431 capacity. As the only undammed, major river in the southeastern United States, the Cahaba River  
432 is much less modified than most other systems in the southeast. Our findings suggest that  
433 imperiled gastropods will benefit from water quality and habitat improvements even in relatively  
434 “pristine” river systems. Improving habitat, or identifying suitable habitat, will be a necessary  
435 starting point for *L. compacta* reintroduction efforts.

436 In addition to having a small range, *L. compacta* only exists along a single river path.  
437 This means that one catastrophic event such as a massive point source pollution event above  
438 Cahaba River at Booth’s Ford could result in extinction of *L. compacta*. Such an event is not  
439 merely a hypothetical. In 2016, a gasoline pipeline spill came perilously close to the Cahaba  
440 River (Pillion, 2016). To mitigate the risks of a single catastrophic event, reintroduction efforts  
441 should emphasize range expansion outside the mainstem Cahaba River. Of course, reintroduction  
442 efforts also must be limited by the historical range of any given species. Thus, lower Buck Creek  
443 is potentially an ideal reintroduction site if habitat quality is sufficient for the persistence of *L.*  
444 *compacta*. Once a suitable reintroduction site is chosen, managers will need to choose a  
445 broodstock site. This decision should be informed with genetic data. The absence of an isolation  
446 by distance effect across the current range of *L. compacta* indicates that managers do not need to  
447 prioritize potential broodstock sites based on whether they are geographically proximate to  
448 reintroduction sites. Rather, sites with high genetic diversity and ease of access should be  
449 prioritized for broodstock. Therefore, the Cahaba River above Shades Creek is likely an ideal  
450 broodstock location. Moreover, *L. compacta* is easy to sample and relatively easy to distinguish  
451 from other sympatric species at Cahaba River above Shades Creek, making it ideal from both a  
452 genetic and sampling standpoint.

453

#### 454 Conclusions

455 Even though *L. compacta* was considered extinct less than a decade ago, we now know  
456 more about this species than most other freshwater gastropods. This is helpful for conservation  
457 of *L. compacta* as the biggest barrier to effective management strategies for most freshwater  
458 gastropods is a lack of data. Future research efforts should focus on differences in dispersal  
459 dynamics among pleurocerids and causes of differences in riverscape genetic patterns seen

460 between *L. ampla* and *L. compacta*. As more population genomic data becomes available for  
461 pleurocerids, we will be better suited to develop strategies to conserve these critically important  
462 components of many North American riverine ecosystems.

463

## 464 **Acknowledgements**

465 We thank Lauren Allred, Jecca Shumante, and Living River: A Retreat on the Cahaba for  
466 providing access to field sites. Haley Dutton (Auburn University) assisted in the field. Jeffrey  
467 Garner (Alabama Department of Conservation and Natural Resources), Matthew Galaska  
468 (University of Washington), Kenneth Halanych (Auburn University) and Katherine Bockrath  
469 (U.S Fish and Wildlife Service) provided advice on multiple components of this work. Rodolfo  
470 Jaffé, Brian Hand, and an anonymous reviewer provided comments that improved the  
471 manuscript. The findings and conclusions in this article are those of the authors and do not  
472 necessarily represent the views of the U.S. Fish and Wildlife Service.

473

## 474 **Funding**

475 This was work funded by a reverted Section 6 grant from Alabama Department of Conservation  
476 and Natural Resources and by United States Fish and Wildlife Service. This study was also  
477 supported in part by NSF grant DBI-1658694, the Alabama Agricultural Experiment Station, and  
478 the Hatch program of the National Institute of Food and Agriculture, U.S. Department of  
479 Agriculture. This work was also made possible in part by a grant of high-performance computing  
480 resources and technical support from the Alabama Supercomputer Authority.

481

## 482 **References**

- 483 ADEM. 2007. 2007 rivers and streams monitoring summary report: Shades Creek at Jefferson  
484 County Road 6. Available at  
485 <http://adem.alabama.gov/programs/water/wqsurvey/table/2007/2007ShadesCk.pdf>  
486 (accessed 15 April 2020)
- 487 ADEM. 2012. 2012 rivers and streams monitoring summary report: Shades Creek at Parkwood  
488 Road in Jefferson County. Available at  
489 <http://adem.alabama.gov/programs/water/wqsurvey/table/2012/2012ShadesCk.pdf>  
490 (accessed 15 April 2020)
- 491 Andrews KR, Good JM, Miller MR, Luikart G, Hohenlohe PA. 2016. Harnessing the power of  
492 RADseq for ecological and evolutionary genomics. *Nature Reviews Genetics* 17:81-92.  
493 DOI: i:10.1038/nrg.2015.28.
- 494 Bennett MG, Howell JH, Kuhajda BR, Freeman PL. 2015. New upstream records for fishes  
495 following dam removal in the Cahaba River, Alabama. *Southeastern Fishes Council*  
496 *Proceedings* 55:50-61. DOI:
- 497 Brown KM, Lang B, Perez KE. 2008. The conservation ecology of North American pleurocerid  
498 and hydrobiid gastropods. *Journal of the North American Benthological Society* 27:484-  
499 495. DOI: 10.1899/07-062.1.
- 500 Catchen JM, Hohenlohe P, Bassham S, Amores A, Cresko W. 2013. Stacks: an analysis tool set  
501 for population genomics. *Molecular Ecology* 22:3124-3140. DOI: 10.1111/mec.12354.
- 502 Chang CC, Chow CC, Tellier LCAM, Vattikuti S, Purcell SM, Lee JJ. 2015. Second-generation  
503 PLINK: rising to the challenge of larger and richer datasets. *GigaScience* 4:7. DOI:  
504 10.1186/s13742-015-0047-8.

- 505 Covich AP, Palmer MA, Crowl TA. 1999. The role of benthic invertebrate species in freshwater  
506 ecosystems: zoobenthic species influence energy flows and nutrient cycling. *Bioscience*  
507 49:119-127. DOI: 10.2307/1313537.
- 508 De Meeûs T. 2018. Revisiting  $F_{IS}$ ,  $F_{ST}$ , Wahlund effects, and null alleles. *Journal of Heredity*  
509 108:446-456. DOI: 10.1093/jhered/esx106.
- 510 Dray S, Dufour AB. 2007. The ade4 package: implementing the duality diagram for ecologists.  
511 *Journal of Statistical Software* 22:1-20. DOI: 10.18637/jss.v022.i04.
- 512 Excoffier L, Smouse PE, Quattro JM. 1992. Analysis of molecular variance inferred from matrix  
513 distances among DNA haplotypes: application to human mitochondrial DNA restriction  
514 data. *Genetics* 131:479-491. DOI:
- 515 Frankham R. 2005. Genetics and extinction. *Biological Conservation* 126:131-140. DOI:  
516 10.1016/j.biocon.2005.05.002.
- 517 Frankham R. 2010. Challenges and opportunities of genetic approaches to biological  
518 conservation. *Biological Conservation* 143:1919-1927. DOI:  
519 10.1016/j.biocon.2010.05.011.
- 520 Fukuda H, Haga T, Tatara Y. 2008. *Niku-nuki*: a useful method for anatomical and DNA studies  
521 on shell-bearing molluscs. *Zoosymposia* 1:15-38. DOI: 10.11646/zoosymposia.1.1.5.
- 522 Goodrich C. 1922. The *Anculosae* of the Alabama River drainage. *University of Michigan*  
523 *Museum of Zoology Miscellaneous Publication No 7*:63.
- 524 Goodrich C. 1941. Distribution of the gastropods of the Cahaba River, Alabama. *Occasional*  
525 *Papers of the Museum of Zoology* 426:1-30.
- 526 Goslee SC, Urban DL. 2007. The ecodist package for dissimilarity-based analysis of ecological  
527 data. *Journal of Statistical Software* 22:1-17. DOI: 10.18637/jss.v022.i07.
- 528 Goudet J. 2005. HIERFSTAT, a package for R to compute and test hierarchical  $F$ -statistics.  
529 *Molecular Ecology Resources* 5:184-186. DOI: 10.1111/j.1471-8286.2004.00828.x.
- 530 Hughes JM, Schmidt DJ, Finn DS. 2009. Genes in streams: using DNA to understand the  
531 movement of freshwater fauna and their riverine habitat. *Bioscience* 59:573-583. DOI:  
532 10.1525/bio.2009.59.7.8.
- 533 Huryn AD, Benke AC, Ward GM. 1995. Direct and indirect effects of geology on the  
534 distribution, biomass, and production of the freshwater snail *Elimia*. *Journal of the North*  
535 *American Benthological Society* 14:519-534. DOI: 10.2307/1467538.
- 536 Johnson PD. 2019. Results of AABC freshwater mollusk survey Cahaba River historic shoal at  
537 Belle Ellen Bibb County, AL-7 May 2019. Report Submitted to Alabama Department of  
538 Conservation and Natural Resources. Marion, Alabama. 6 pp.
- 539 Johnson PD, Bogan AE, Brown KM, Burkhead NM, Cordeiro JR, Garner JT, Hartfield PD,  
540 Lepitzki DAW, Mackie GL, Pip E, Tarpley TA, Tiemann JS, Whelan NV, Strong EE.  
541 2013. Conservation status of freshwater gastropods of Canada and the United States.  
542 *Fisheries* 38:247-282. DOI: 10.1080/03632415.2013.785396.
- 543 Johnson PD, Sides JD, McGregor SW, Ahlstedt SA, Garner JT, Butler RS, Novak SF. 2006.  
544 Inventory of freshwater mollusks in the Cahaba River Basin, Alabama. Submitted to the  
545 Alabama Department of Conservation and Natural Resources. 153 pp.
- 546 Jombart T, Ahmed I. 2011. adegenet 1.3-1: new tools for the analysis of genome-wide SNP data.  
547 *Bioinformatics* 27:3070-3071. DOI: 10.1093/bioinformatics/btr521.
- 548 Kamvar ZN, Tabima JF, Grünwald NJ. 2014. Poppr: an R package for genetic analysis of  
549 populations with clonal, partially clonal, and/or sexual reproduction. *PeerJ* 2:e281. DOI:  
550 10.7717/peerj.281.

- 551 Keenan K, McGinnity P, Cross TF, Crozier WW, Prodöhl PA. 2013. diveRsity: an R package for  
552 the estimation and exploration of population genetics parameters and their associated  
553 errors. *Methods in Ecology and Evolution* 48:782-788. DOI: 10.1111/2041-210X.12067.
- 554 Kopelman NM, Mayzel J, Jakobsson M, Rosebnberg NA, Mayrose I. 2015. Clumpak: a program  
555 for identifying clustering modes and packaging population structure inferences across K.  
556 *Molecular Ecology Resources* 15:1179-1191. DOI: 10.1111/1755-0998.12387.
- 557 Kurth JW. 2017. Endangered and threatened wildlife and plants; 90-day findings for five species.  
558 *Federal Register* 82:60362-60366.
- 559 Lambert SM, Streicher JW, Fisher-Reid MC, Méndez de la Cruz FR, Martínez-Méndez N,  
560 García-Vázquez UO, de Oca ANM, Wiens JJ. 2019. Inferring introgression using  
561 RADseq and D<sub>FOIL</sub>: Power and pitfalls revealed in a case study of spiny lizards  
562 (*Sceloporus*). *Molecular Ecology Resources* 19:818-837. DOI: 10.1111/1755-  
563 0998.12972.
- 564 Lawson DJ, Hellenthal G, Myers S, Falush D. 2012. Inference of population structure using  
565 dense haplotype data. *PLoS Genetics* 8:e1002453. DOI: 10.1371/journal.pgen.1002453.
- 566 Legendre P, Fortin M-J, Borcard D. 2015. Should the Mantel test be used in spatial analysis.  
567 *Methods in Ecology and Evolution* 6:1239-1247. DOI: 10.1111/2041-210X.12425.
- 568 Leigh DM, Lischer HEL, Keller LF. 2018. Batch effects in a multiyear sequencing study: false  
569 biological trends due to changes in read lengths. *Molecular Ecology Resources* 18:778-  
570 788. DOI: 10.1111/1755-0998.12779.
- 571 Lydeard C, Cowie RH, Ponder W, F., Bogan AE, Bouchet P, Clark SA, Cummings KS, Frest TJ,  
572 Gargominy O, Herbert DG, Hershler R, Perez KE, Roth B, Seddon M, Strong EE,  
573 Thompson FG. 2004. The global decline of nonmarine mollusks. *BioScience* 54:321-330.  
574 DOI: 10.1641/0006-3568(2004)054[0321:TGDONM]2.0.CO;2.
- 575 Lydeard C, Mayden RL. 1995. A diverse and endangered ecosystem of the southeast United  
576 States. *Conservation Biology* 9:800-805. DOI: 10.1046/j.1523-1739.1995.09040800.x.
- 577 Lysne SJ, Perez KE, Brown KM, Minton RL, Sides JD. 2008. A review of freshwater gastropod  
578 conservation: challenges and opportunities. *Journal of the North American Benthological*  
579 *Society* 27:463-470. DOI: 10.1899/07-061.1.
- 580 Malinsky M, Trucchi E, Lawson DJ, Falush D. 2018. RADpainter and fineRADstructure:  
581 population inference from RADseq Data. *Molecular Biology and Evolution* 35:1284-  
582 1290. DOI: 10.1093/molbev/msy023.
- 583 Manichaikul A, Mychaleckyj JC, Rich SS, Daly K, Sale M, Chen WM. 2010. Robust  
584 relationship inference in genome-wide association studies. *Bioinformatics* 26:2867-2873.  
585 DOI: 10.1093/bioinformatics/btq559.
- 586 Meirmans PG. 2015. Seven common mistakes in population genetics and how to avoid them.  
587 *Molecular Ecology* 24:3223-3231. DOI: 10.1111/mec.13243.
- 588 Mussman, SM, Douglas MR, Chafin TK, Douglas ME. 2020. AdmixPipe: population analyses in  
589 ADMIXTURE for non-model organisms. DOI: 10.5281/zenodo.3270852
- 590 Onorato D, Angus RA, Marion KR. 2000. Historical changes in the ichthyofaunal assemblages of  
591 the upper Cahaba River in Alabama associated with extensive urban development in the  
592 watershed. *Journal of Freshwater Ecology* 15:47-63. DOI:  
593 10.1080/02705060.2000.9663721.
- 594 Paris JR, Stevens JR, Catchen JM. 2017. Lost in parameter space: a road map for Stacks.  
595 *Methods in Ecology and Evolution* 8:1360-1373. DOI: 10.1111/2041-210X.12775.

- 596 Paz-Vinas I, Loot G, Stevens VM, Blanchet S. 2015. Evolutionary processes driving spatial  
597 patterns of intraspecific genetic diversity in river ecosystems. *Molecular Ecology*  
598 24:4586-4604. DOI: 10.1111/mec.13345.
- 599 Perez KE, Minton RL. 2008. Practical applications for systematics and taxonomy in North  
600 American freshwater gastropod conservation. *Journal of the North American*  
601 *Benthological Society* 27:471-483. DOI: 10.1899/07-059.1.
- 602 Pillion D. 2016. Alabama pipeline leak: what we know so far about the spill, gas shortages and  
603 more. Available at  
604 [https://www.al.com/news/birmingham/2016/09/how\\_alabama\\_pipeline\\_leak\\_led.html](https://www.al.com/news/birmingham/2016/09/how_alabama_pipeline_leak_led.html)  
605 (accessed March 19, 2020).
- 606 Pitt RE. 2000. Water quality conditions in the Cahaba River and likely pollutant sources.  
607 Birmingham, Alabama: Department of Civil and Environmental Engineering, University  
608 of Alabama at Birmingham.
- 609 Potter JJ, Thomas WL. 1983. Endangered and threatened species listing and recovery priority  
610 guidelines. *Federal Register* 48:43098-43105. DOI:
- 611 R Core Team. 2020. R: A language and environment for statistical computing. Vienna, Austria:  
612 R Foundation for Statistical Computing.
- 613 Rumble SM, Lacroute P, Dalca AV, Fiume M, Sidow A, Brundo M. 2009. SHRiMP: accurate  
614 mapping of short color-space reads. *PLoS Computational Biology* 5:e1000386. DOI:  
615 10.1371/journal.pcbi.1000386.
- 616 Service NMF. 2018. Interim Endangered and Threatened Speices Recovery Planning Guidance  
617 Version 1.4. In: Administration NOaA, editor. Silver Spring, Maryland. p 122.
- 618 Shepard TE, O'Neil PE, McGregor SW, Harris SC. 1994. Water-quality and biomonitoring  
619 studies in the upper Cahaba River drainage of Alabama. *Geological Survey of Alabama*  
620 *Bulletin* 160:1-118. DOI:
- 621 Shringarpure SS, Bustamante CD, Lange K, Alexander DH. 2016. Efficient analysis of large  
622 datasets and sex bias with ADMIXTURE. *BMC Bioinformatics* 17:218. DOI:  
623 10.1186/s12859-016-1082-x.
- 624 Strong EE, Gargominy O, Ponder W, F., Bouchet P. 2008. Global diversity of gastropods  
625 (Gastropoda; Mollusca) in freshwater. *Hydrobiologia* 595:149-166. DOI:  
626 10.1007/S10750-007-9012-6.
- 627 Strong EE, Köhler F. 2009. Morphological and molecular analysis of '*Melania jacqueti*'  
628 Dautzenberg and Fischer, 1906: from anonymous orphan to critical basal offshoot of the  
629 Semisulcospiridae (Gastropoda: Cerithioidea). *Zoologica Scripta* 38:483-502. DOI:  
630 10.1111/j.1463-6409.2008.00385.x.
- 631 Tolley-Jordan LR, Hury AD, Bogan AE. 2015. Effects of land-use change on a diverse  
632 pleurocerid snail assemblage. *Aquatic Conservation: Marine and Freshwater Ecosystems*  
633 25:235-249. DOI: 10.1002/aqc.2474.
- 634 Wahlund S. 1928. Zusammensetzung von population und korrelationserscheinung vom stand-  
635 punkt der vererbungslehre aus betrachtet. *Hereditas* 11:65-106. [English translation. In:  
636 Weiss KM, Ballonoff PA, editors. 1975. Demographic Genetics. Dowden, Hutchinson  
637 and Ross, Stroudsburg. p. 224–263]
- 638 Wang S, Meyer E, McKay JK, Matz MV. 2012. 2b-RAD: a simple and flexible method for  
639 genome-wide genotyping. *Nature Methods* 9:808-810. DOI: 10.1038/nmeth.2023.
- 640 Weir BS, Cockerham CC. 1984. Estimating *F-statistics* for the analysis of population structure.  
641 *Evolution* 38:1358-1370. DOI: 10.1111/j.1558-5646.1984.tb05657.x.

642 Whelan NV, Galaska MP, Siple BN, Weber JM, Johnson PD, Halanych KM, Helms BS. 2019.  
643 Riverscape genetic variation, migration patterns, and morphological variation of the  
644 threatened Round Rocksnail, *Leptoxis ampla*. *Molecular Ecology* 28:1593-1610. DOI:  
645 10.1111/mec.15032.

646 Whelan NV, Johnson PD, Harris PM. 2012. Rediscovery of *Leptoxis compacta* (Anthony, 1854)  
647 (Gastropoda: Cerithioidea: Pleuroceridae). *PLoS One* 7:e42499. DOI:  
648 10.1371/journal.pone.0042499.

649 Whelan NV, Johnson PD, Harris PM. 2015. Life-history traits and shell morphology in the genus  
650 *Leptoxis* Rafinesque, 1819 (Gastropoda: Cerithioidea: Pleuroceridae). *Journal of*  
651 *Molluscan Studies* 81:85-95. DOI: 10.1093/mollus/eyu058.

652  
653  
654  
655  
656  
657  
658  
659  
660  
661  
662  
663  
664  
665  
666  
667  
668  
669  
670  
671  
672  
673  
674  
675  
676  
677  
678  
679

680 **Tables**

681 Table 1: Summary statistics and AUMNH catalog numbers of *L. compacta* at each collection site.

| Collection Site                 | Private alleles | H <sub>o</sub> (sd) | H <sub>e</sub> (sd) | A <sub>r</sub> (sd) | Π (sd)          | F <sub>is</sub> | AUMNH #     |
|---------------------------------|-----------------|---------------------|---------------------|---------------------|-----------------|-----------------|-------------|
| Cahaba River at Booth's Ford    | 43              | 0.1568 (0.1349)     | 0.1801 (0.1222)     | 1.8241 (0.2742)     | 0.1855 (0.1261) | 0.1319          | 45691-45709 |
| Cahaba River at canoe launch    | 32              | 0.1046 (0.1552)     | 0.1045 (0.1421)     | 1.4511 (0.4518)     | 0.1075 (0.1459) | 0.0134          | 45709-45729 |
| Cahaba River above Shades Creek | 262             | 0.1363 (0.1334)     | 0.1779 (0.1245)     | 1.8072 (0.2883)     | 0.1829 (0.1281) | 0.1934          | 45671-45690 |
| Cahaba River at Old Marvel Slab | 28              | 0.0963 (0.1400)     | 0.0981 (0.1343)     | 1.4606 (0.4387)     | 0.1010 (0.1382) | 0.0226          | 45652-45670 |

682

683

684 Table 2: Pairwise F<sub>ST</sub> and distances (km) between sites. F<sub>ST</sub> below diagonal and distances above diagonal

|                                 | Booth's Ford | boat launch | above Shades Creek | old Marvel slab |
|---------------------------------|--------------|-------------|--------------------|-----------------|
| Cahaba River at Booth's Ford    | -            | 4.62        | 5.55               | 9.2             |
| Cahaba River at canoe launch    | 0.04         | -           | 0.98               | 4.57            |
| Cahaba River above Shades Creek | 0            | 0.05        | -                  | 3.64            |
| Cahaba River at old Marvel slab | 0.03         | 0.04        | 0.03               | -               |

685

686

687

688

689



690 **Figures**

691 Figure 1: Photograph of live *L. compacta*. Photo Credit: Thomas Tarpley, ADCNR.

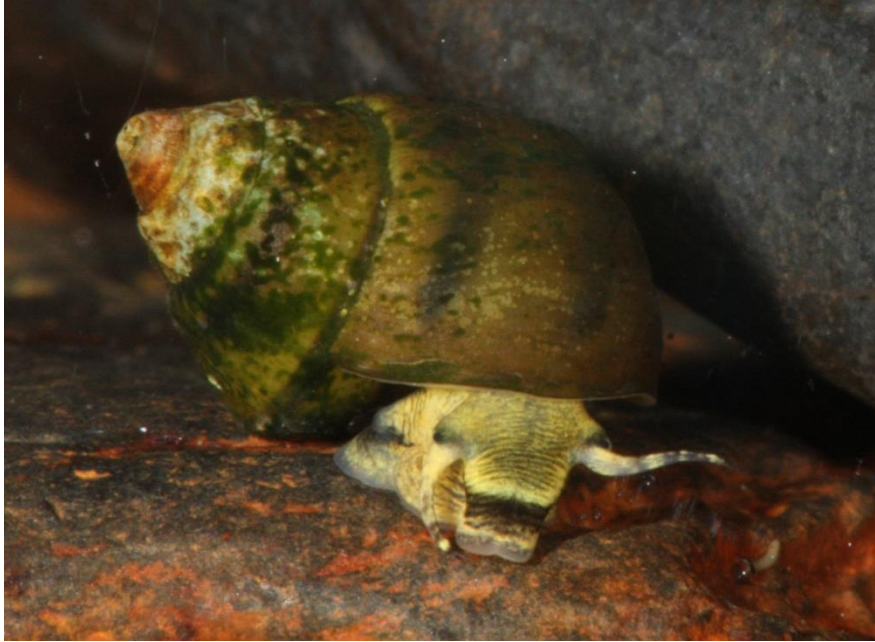

692  
693  
694  
695  
696  
697  
698  
699  
700

701 Figure 2: Shells of representative individuals that we sequenced. A) Cahaba River at Canoe  
702 Launch, B) Cahaba River at Booth's Ford, C) Cahaba River above Shades Creek, D-F)  
703 Cahaba River at old Marvel slab. Scale bar = 1 cm

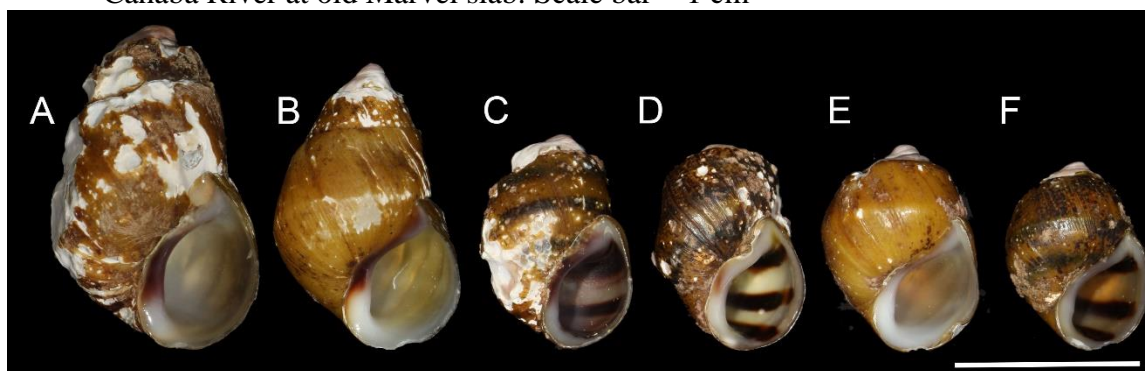

704  
705  
706  
707  
708  
709  
710

711 Figure 3: Map of known historical and current range of *L. compacta*, collection sites, and other  
712 landmarks. Lines from collection sites lead to ADMIXTURE plots with  $K = 2$  for each  
713 site. Each column is an individual with ADMIXTURE proportions of the two inferred  
714 ancestral populations.

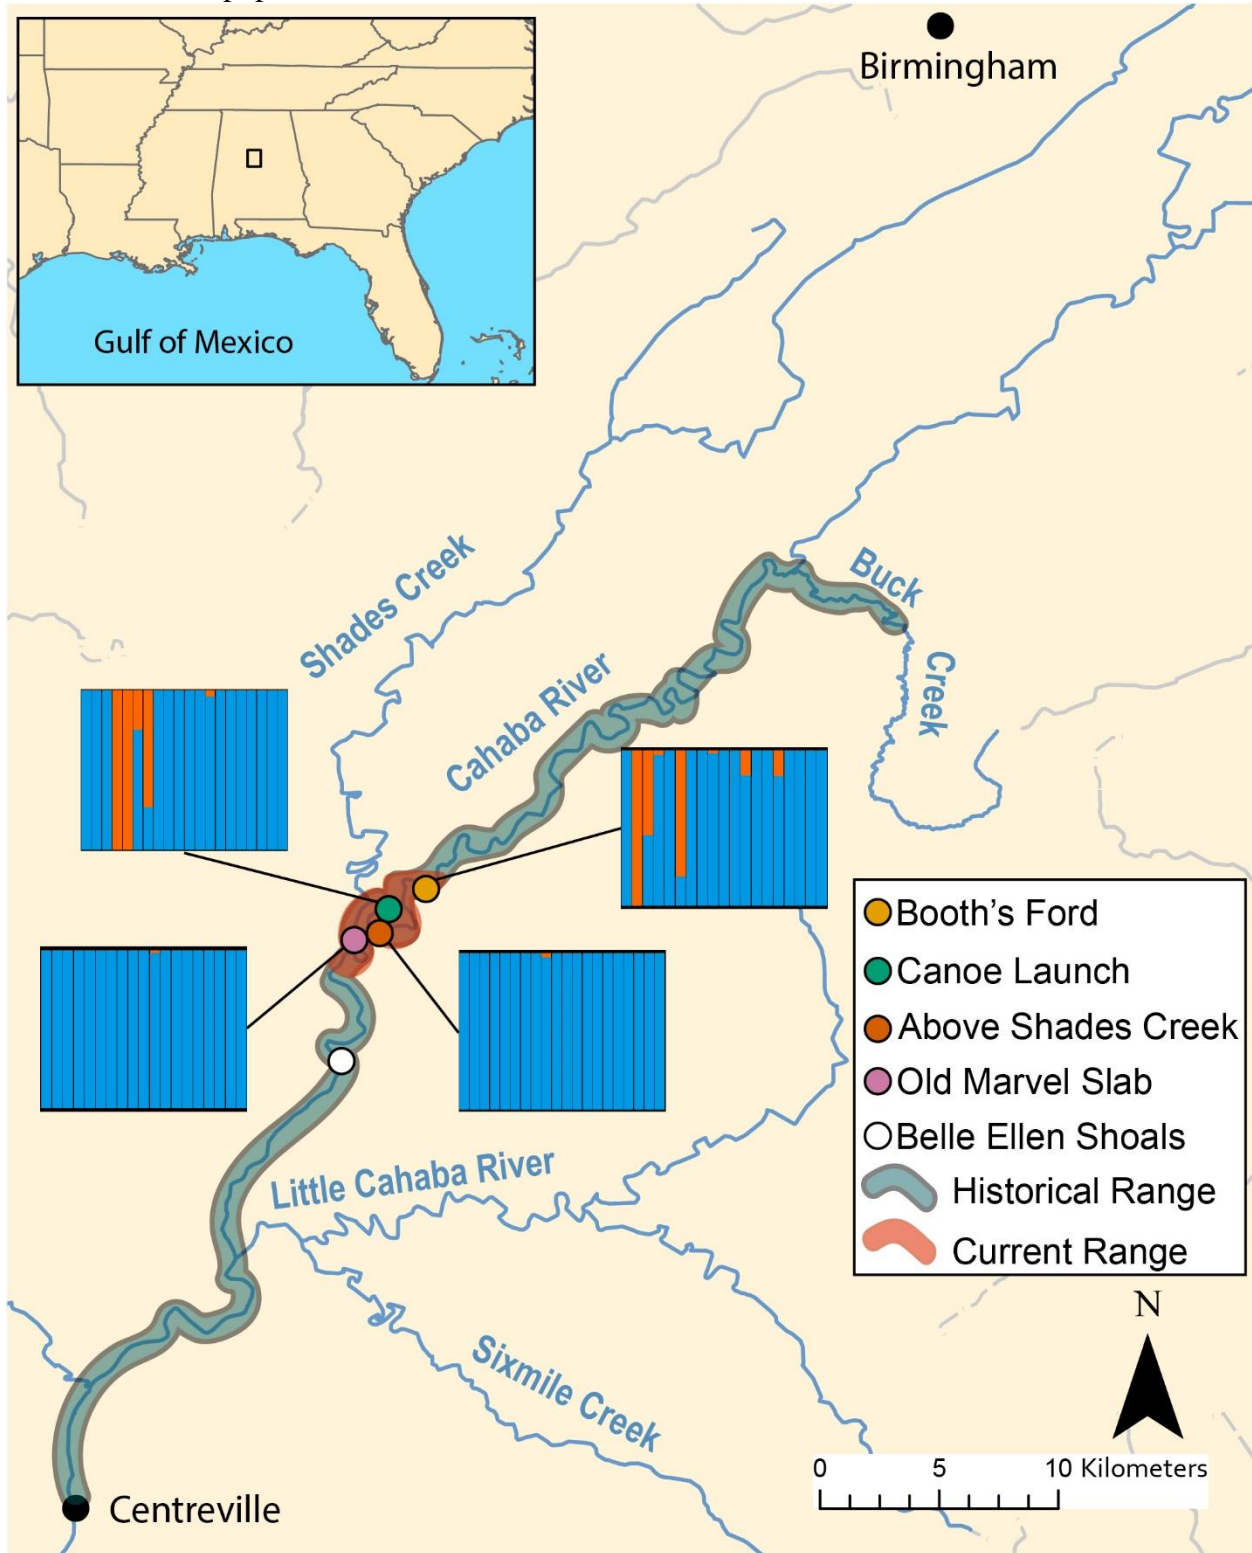

716 Figure 4: DAPC plot colored by genetic cluster. Tick marks on x-axis represent individuals.

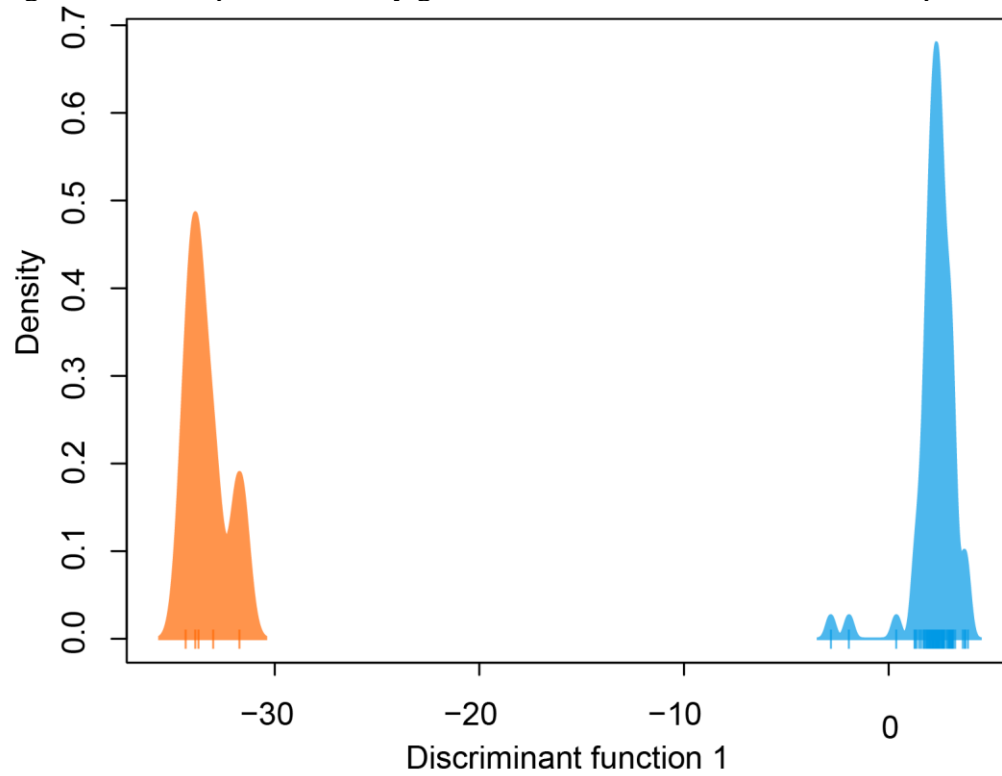

717  
718  
719  
720  
721  
722  
723  
724  
725  
726  
727  
728  
729  
730  
731  
732  
733  
734  
735  
736  
737  
738  
739  
740

741 Figure 5: Pairwise co-ancestry matrix and simple tree inferred with fineRADstructure. Boxes  
742 surround the two main groupings. Tick marks represent individuals, but labels have been  
743 removed for visualization. For a figure with full taxon labels, see Supplementary Figure  
744 1.

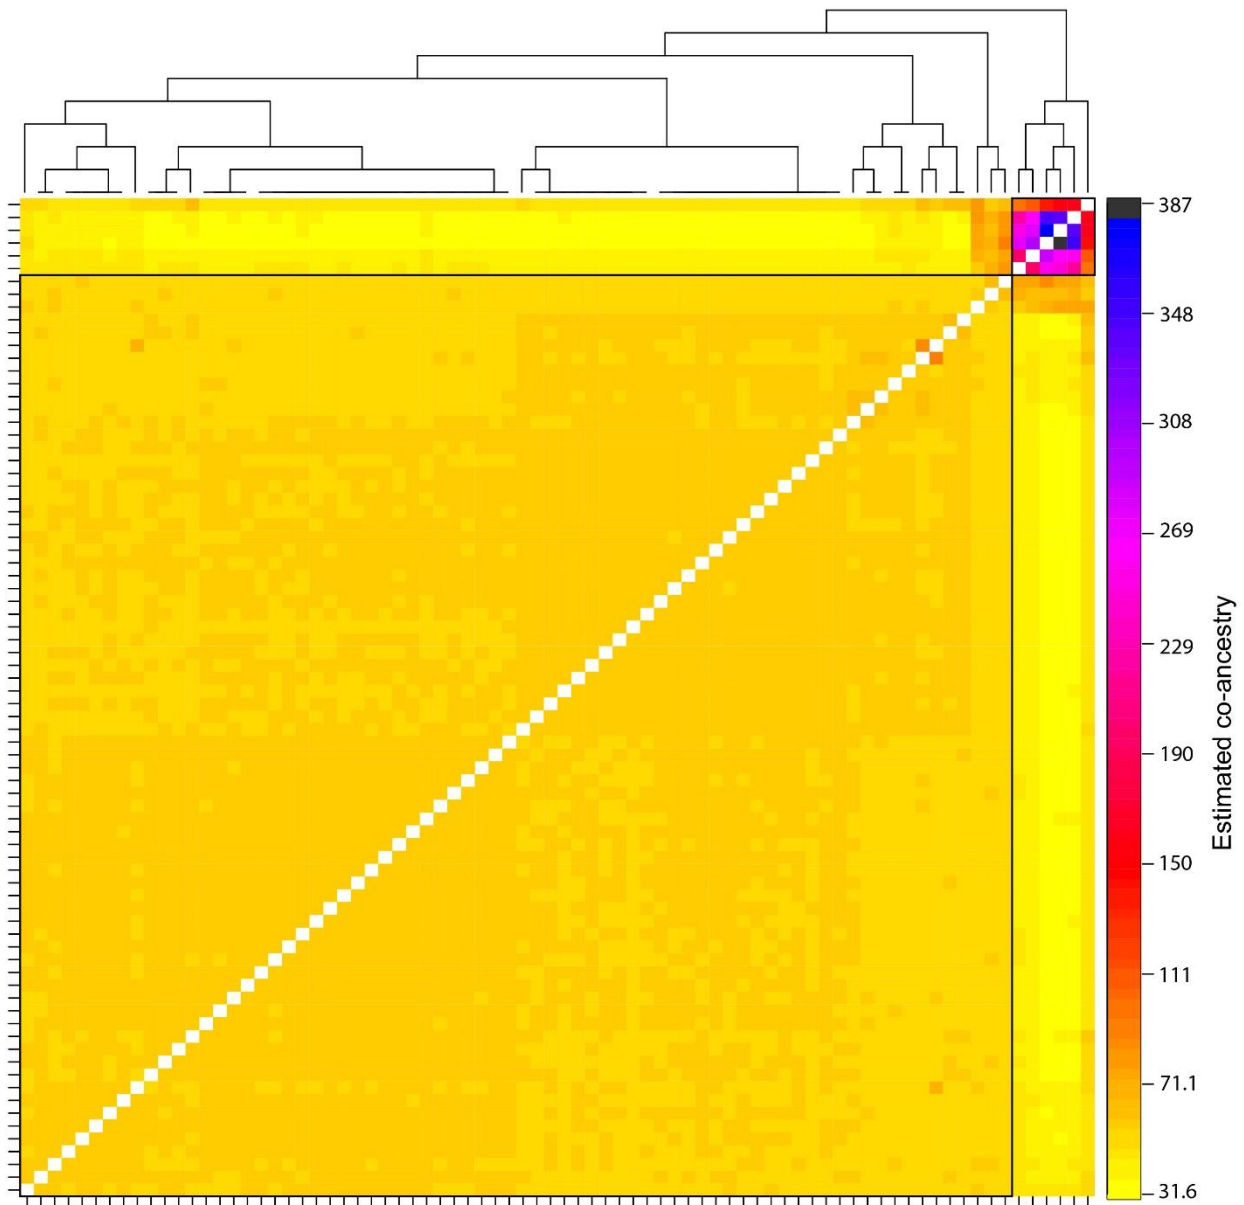

745  
746  
747  
748  
749  
750  
751  
752  
753  
754

755 Supplementary Table 1: Collection localities, Auburn University Museum of Natural History,  
756 and SRA accession numbers.

| Lab Number | Locality                           | AUMNH Catalog Number | NCBI SRA accession |
|------------|------------------------------------|----------------------|--------------------|
| Lcom_pop01 | Cahaba River at old Marvel slab    | 45652                | SRR11773571        |
| Lcom_pop02 | Cahaba River at old Marvel slab    | 45653                | SRR11773570        |
| Lcom_pop03 | Cahaba River at old Marvel slab    | 45654                | SRR11773559        |
| Lcom_pop04 | Cahaba River at old Marvel slab    | 45655                | SRR11773548        |
| Lcom_pop05 | Cahaba River at old Marvel slab    | 45656                | SRR11773537        |
| Lcom_pop06 | Cahaba River at old Marvel slab    | 45657                | SRR11773604        |
| Lcom_pop08 | Cahaba River at old Marvel slab    | 45658                | SRR11773593        |
| Lcom_pop09 | Cahaba River at old Marvel slab    | 45659                | SRR11773582        |
| Lcom_pop10 | Cahaba River at old Marvel slab    | 45660                | SRR11773573        |
| Lcom_pop11 | Cahaba River at old Marvel slab    | 45661                | SRR11773572        |
| Lcom_pop12 | Cahaba River at old Marvel slab    | 45662                | SRR11773569        |
| Lcom_pop13 | Cahaba River at old Marvel slab    | 45663                | SRR11773568        |
| Lcom_pop14 | Cahaba River at old Marvel slab    | 45664                | SRR11773567        |
| Lcom_pop15 | Cahaba River at old Marvel slab    | 45665                | SRR11773566        |
| Lcom_pop16 | Cahaba River at old Marvel slab    | 45666                | SRR11773565        |
| Lcom_pop17 | Cahaba River at old Marvel slab    | 45667                | SRR11773564        |
| Lcom_pop18 | Cahaba River at old Marvel slab    | 45668                | SRR11773563        |
| Lcom_pop19 | Cahaba River at old Marvel slab    | 45669                | SRR11773562        |
| Lcom_pop20 | Cahaba River at old Marvel slab    | 45670                | SRR11773561        |
| Lcom_pop21 | Cahaba River at above Shades Creek | 45671                | SRR11773560        |
| Lcom_pop22 | Cahaba River at above Shades Creek | 45672                | SRR11773558        |
| Lcom_pop23 | Cahaba River at above Shades Creek | 45673                | SRR11773557        |
| Lcom_pop24 | Cahaba River at above Shades Creek | 45674                | SRR11773556        |
| Lcom_pop25 | Cahaba River at above Shades Creek | 45675                | SRR11773555        |
| Lcom_pop26 | Cahaba River at above Shades Creek | 45676                | SRR11773554        |
| Lcom_pop27 | Cahaba River at above Shades Creek | 45677                | SRR11773553        |
| Lcom_pop28 | Cahaba River at above Shades Creek | 45678                | SRR11773552        |
| Lcom_pop29 | Cahaba River at above Shades Creek | 45679                | SRR11773551        |
| Lcom_pop30 | Cahaba River at above Shades Creek | 45680                | SRR11773550        |
| Lcom_pop31 | Cahaba River at above Shades Creek | 45681                | SRR11773549        |
| Lcom_pop32 | Cahaba River at above Shades Creek | 45682                | SRR11773547        |
| Lcom_pop33 | Cahaba River at above Shades Creek | 45683                | SRR11773546        |
| Lcom_pop34 | Cahaba River at above Shades Creek | 45684                | SRR11773545        |
| Lcom_pop35 | Cahaba River at above Shades Creek | 45685                | SRR11773544        |
| Lcom_pop36 | Cahaba River at above Shades Creek | 45686                | SRR11773543        |
| Lcom_pop37 | Cahaba River at above Shades Creek | 45687                | SRR11773542        |
| Lcom_pop38 | Cahaba River at above Shades Creek | 45688                | SRR11773541        |
| Lcom_pop39 | Cahaba River at above Shades Creek | 45689                | SRR11773540        |

|            |                                     |       |             |
|------------|-------------------------------------|-------|-------------|
| Lcom_pop40 | Cahaba River at above Shades Creek  | 45690 | SRR11773539 |
| Lcom_pop41 | Cahaba River at Booth's Ford        | 45691 | SRR11773538 |
| Lcom_pop42 | Cahaba River at Booth's Ford        | 45692 | SRR11773536 |
| Lcom_pop44 | Cahaba River at Booth's Ford        | 45693 | SRR11773613 |
| Lcom_pop45 | Cahaba River at Booth's Ford        | 45694 | SRR11773612 |
| Lcom_pop46 | Cahaba River at Booth's Ford        | 45695 | SRR11773611 |
| Lcom_pop47 | Cahaba River at Booth's Ford        | 45696 | SRR11773610 |
| Lcom_pop48 | Cahaba River at Booth's Ford        | 45697 | SRR11773609 |
| Lcom_pop49 | Cahaba River at Booth's Ford        | 45698 | SRR11773608 |
| Lcom_pop50 | Cahaba River at Booth's Ford        | 45699 | SRR11773607 |
| Lcom_pop51 | Cahaba River at Booth's Ford        | 45700 | SRR11773606 |
| Lcom_pop52 | Cahaba River at Booth's Ford        | 45701 | SRR11773605 |
| Lcom_pop53 | Cahaba River at Booth's Ford        | 45702 | SRR11773603 |
| Lcom_pop54 | Cahaba River at Booth's Ford        | 45703 | SRR11773602 |
| Lcom_pop55 | Cahaba River at Booth's Ford        | 45704 | SRR11773601 |
| Lcom_pop56 | Cahaba River at Booth's Ford        | 45705 | SRR11773600 |
| Lcom_pop57 | Cahaba River at Booth's Ford        | 45706 | SRR11773599 |
| Lcom_pop58 | Cahaba River at Booth's Ford        | 45707 | SRR11773598 |
| Lcom_pop59 | Cahaba River at Booth's Ford        | 45708 | SRR11773597 |
| Lcom_pop60 | Cahaba River at Booth's Ford        | 45709 | SRR11773596 |
| Lcom_pop61 | Cahaba River at Lebron canoe launch | 45710 | SRR11773595 |
| Lcom_pop62 | Cahaba River at Lebron canoe launch | 45711 | SRR11773594 |
| Lcom_pop63 | Cahaba River at Lebron canoe launch | 45712 | SRR11773592 |
| Lcom_pop64 | Cahaba River at Lebron canoe launch | 45713 | SRR11773591 |
| Lcom_pop65 | Cahaba River at Lebron canoe launch | 45714 | SRR11773590 |
| Lcom_pop66 | Cahaba River at Lebron canoe launch | 45715 | SRR11773589 |
| Lcom_pop67 | Cahaba River at Lebron canoe launch | 45716 | SRR11773588 |
| Lcom_pop68 | Cahaba River at Lebron canoe launch | 45717 | SRR11773587 |
| Lcom_pop69 | Cahaba River at Lebron canoe launch | 45718 | SRR11773586 |
| Lcom_pop70 | Cahaba River at Lebron canoe launch | 45719 | SRR11773585 |
| Lcom_pop71 | Cahaba River at Lebron canoe launch | 45720 | SRR11773584 |
| Lcom_pop72 | Cahaba River at Lebron canoe launch | 45721 | SRR11773583 |
| Lcom_pop73 | Cahaba River at Lebron canoe launch | 45722 | SRR11773581 |
| Lcom_pop74 | Cahaba River at Lebron canoe launch | 45723 | SRR11773580 |
| Lcom_pop75 | Cahaba River at Lebron canoe launch | 45724 | SRR11773579 |
| Lcom_pop76 | Cahaba River at Lebron canoe launch | 45725 | SRR11773578 |
| Lcom_pop77 | Cahaba River at Lebron canoe launch | 45726 | SRR11773577 |
| Lcom_pop78 | Cahaba River at Lebron canoe launch | 45727 | SRR11773576 |
| Lcom_pop79 | Cahaba River at Lebron canoe launch | 45728 | SRR11773575 |
| Lcom_pop80 | Cahaba River at Lebron canoe launch | 45729 | SRR11773574 |

Supplementary Figure 1: Pairwise co-ancestry matrix and simple tree inferred with fineRADstructure. Tick marks represent individuals. Lcompop\_01-20: Cahaba River at old Marvel slab; Lcompop\_21-40: Cahaba River above Shades Creek; Lcompop\_41-60: Cahaba River at Booth's Ford; Lcompop\_61-80: Cahaba River at canoe launch

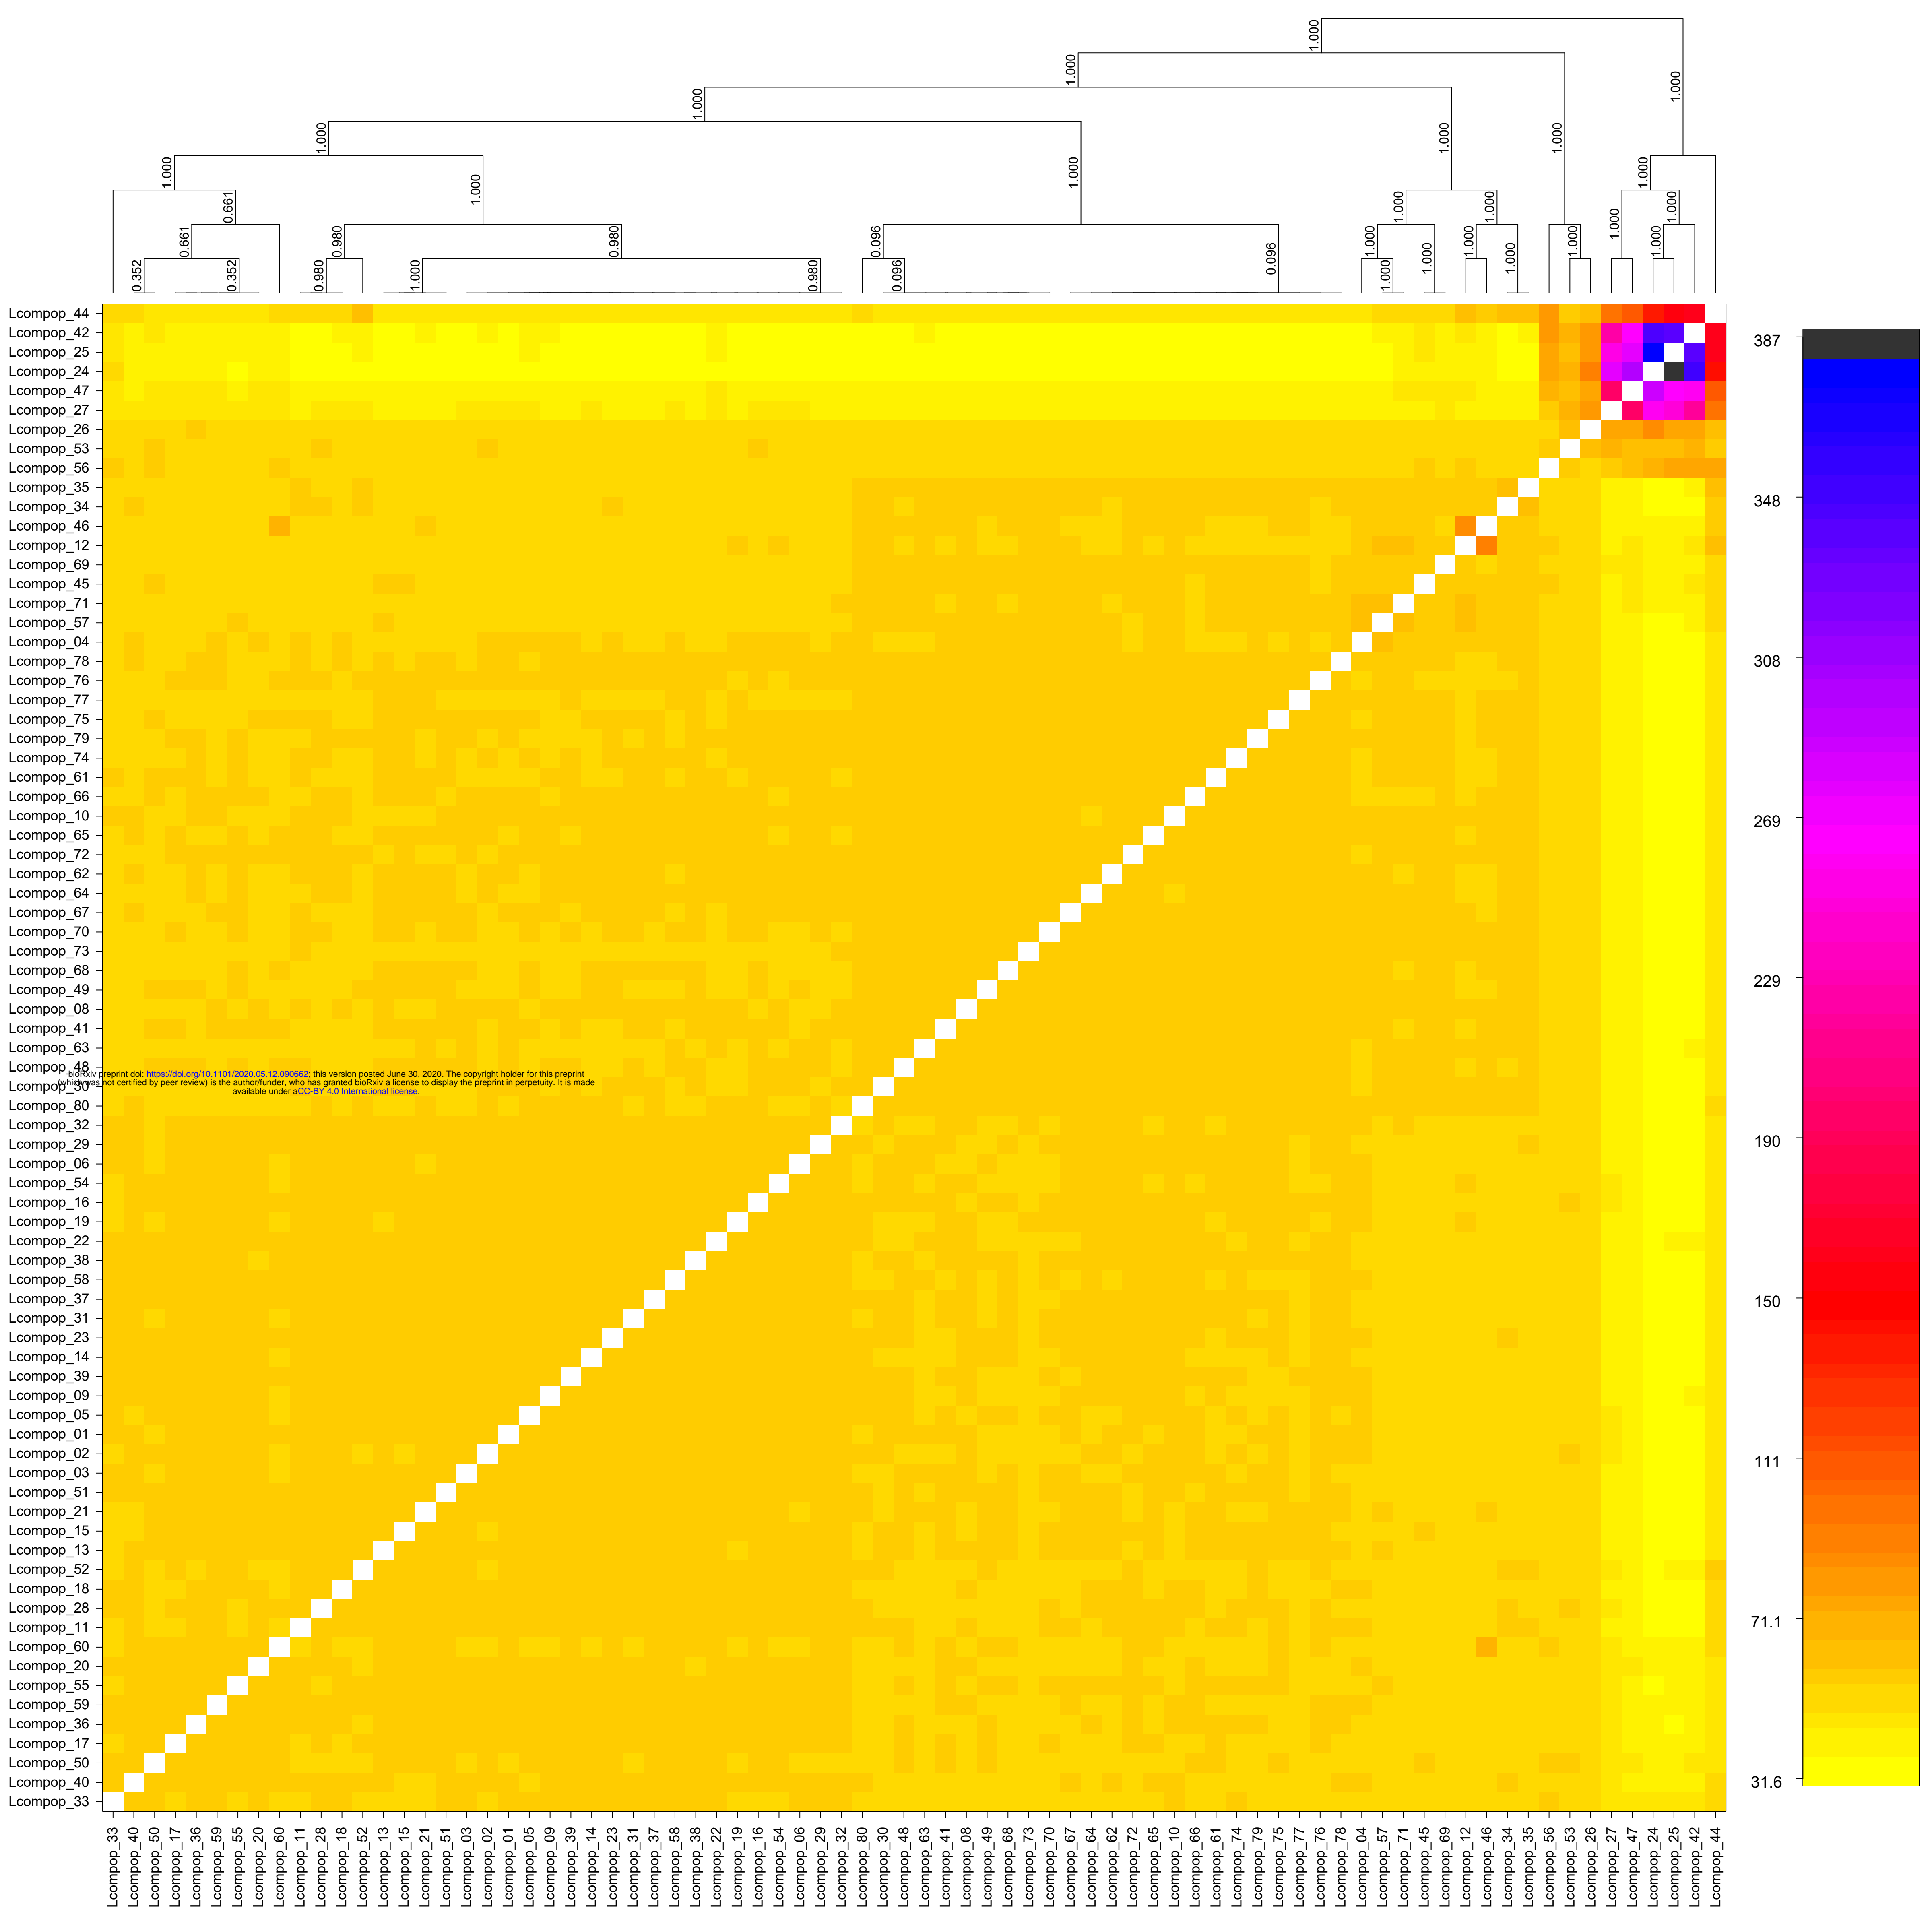

Source: https://www.biorxiv.org/content/10.1101/2020.05.12.090662v2.full.pdf
